# Supplementary material for: Tumor-associated factors are enriched in lymphatic exudate compared to plasma in metastatic melanoma patients
Source: PubMed Central journal article supplement — J Exp Med. 2019 Apr 11;216(5):1091–107. doi: 10.1084/jem.20181618 (PMC6504224; doi:10.1084/jem.20181618), 2019-04-11
Supplement: JEM_20181618_sm.pdf [file JEM_20181618_sm.pdf]

## Supplemental material

Broggi et al., <https://doi.org/10.1084/jem.20181618>

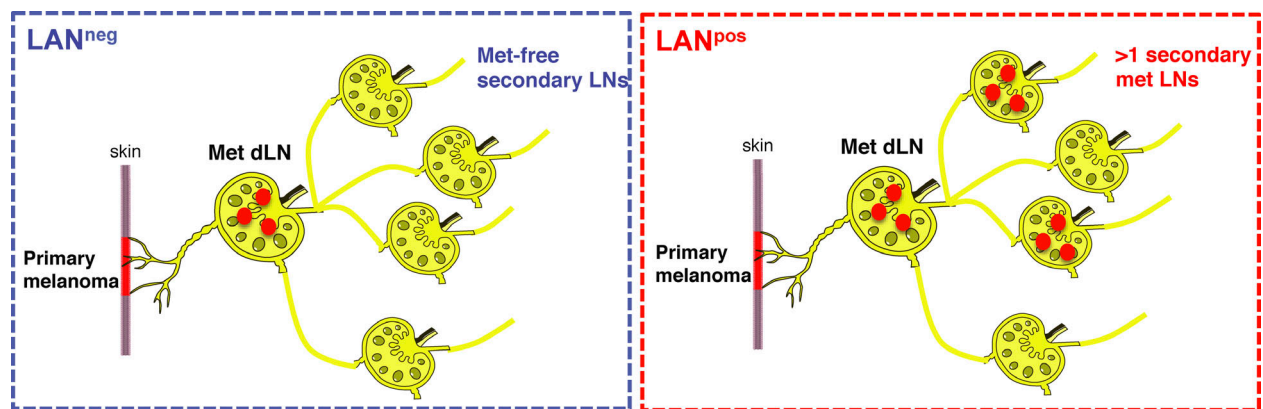

Figure S1. Schematic explaining the collection of lymphatic exudate samples in LAN<sup>neg</sup> and LAN<sup>pos</sup> patients. Met, metastasis.

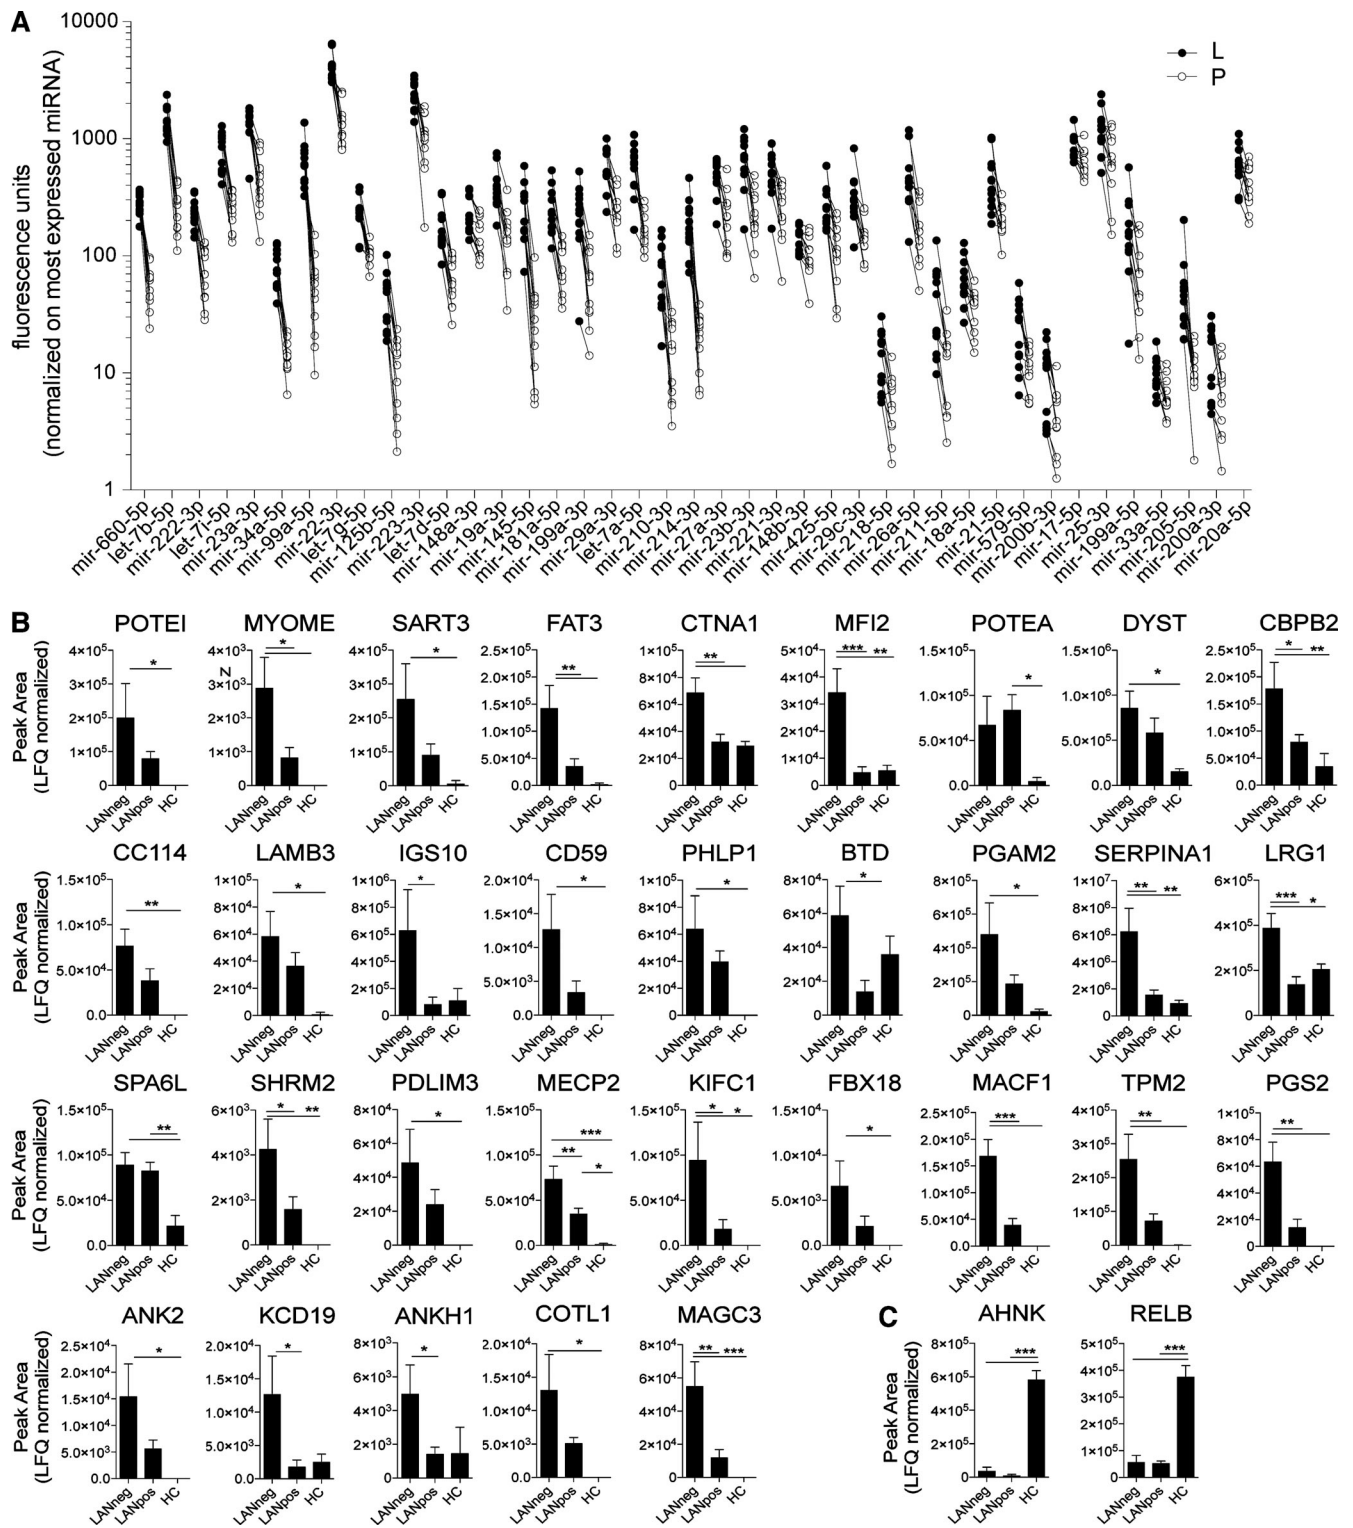

Figure S2. **Lymphatic exudate is enriched in miRNA and proteins associated with metastatic melanoma.** (A) Paired tumor-associated miRNA expression of lymphatic exudate (L) and plasma (P) of pooled LAN<sup>neg</sup> ( $n = 5$ ) and LAN<sup>pos</sup> ( $n = 7$ ) melanoma patients (P values are listed in Table S1). (B and C) Expression of melanoma-associated proteins reported in publicly available Human Protein Atlas to be (B) up- or (C) down-regulated in melanoma tumors and identified by LFQ analysis to be significantly expressed in the lymphatic exudate of LAN<sup>neg</sup> and LAN<sup>pos</sup> patients as compared with HCs ( $n = 6$  for LAN<sup>neg</sup>,  $n = 12$  for LAN<sup>pos</sup>, and  $n = 5$  for HC). Data shown as mean  $\pm$  SEM. \*,  $P < 0.05$ ; \*\*,  $P < 0.01$ ; and \*\*\*,  $P < 0.001$  using one-way ANOVA with Tukey's multiple comparison test.

### A LAN<sup>neg</sup> vs healthy lymph

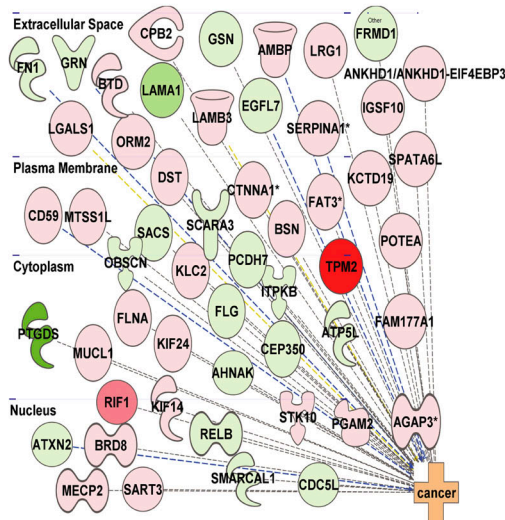

| Symbol                                                     | Entrez Gene Name                                                  | Fold Change |
|------------------------------------------------------------|-------------------------------------------------------------------|-------------|
| <b>Upregulated in LAN<sup>neg</sup> vs healthy lymph</b>   |                                                                   |             |
| TPM2                                                       | tropomyosin 2 (beta)                                              | 617.94      |
| RIF1                                                       | replication timing regulatory factor 1                            | 307.212     |
| MECP2                                                      | methyl-CpG binding protein 2                                      | 89.057      |
| FAT3                                                       | FAT atypical cadherin 3                                           | 60.7        |
| AGAP3                                                      | ArfGAP with GTPase domain, ankyrin repeat and PH domain 3         | 26.481      |
| PGAM2                                                      | phosphoglycerate mutase 2                                         | 20.114      |
| POTEA                                                      | POTE ankyrin domain family member A                               | 15.576      |
| CD59                                                       | CD59 molecule                                                     | 13.744      |
| LGALS1                                                     | galectin 1                                                        | 12.006      |
| SERPINA1                                                   | serpin family A member 1                                          | 7.391       |
| IGSF10                                                     | immunoglobulin superfamily member 10                              | 7.108       |
| MELTF                                                      | melanotransferrin                                                 | 6.791       |
| CPB2                                                       | carboxypeptidase B2                                               | 6.355       |
| KCTD19                                                     | potassium channel tetramerization domain containing 19            | 6.347       |
| DST                                                        | dystonin                                                          | 5.676       |
| LAMB3                                                      | laminin subunit beta 3                                            | 5.371       |
| SPATA6L                                                    | spermatogenesis associated 6 like                                 | 4.945       |
| KIF24                                                      | kinesin family member 24                                          | 3.853       |
| FLNA                                                       | filamin A                                                         | 3.654       |
| ANKHD1/ANKHD1-EIF4EBP3                                     | ankyrin repeat and KH domain containing 1                         | 3.306       |
| CTNNA1                                                     | catenin alpha 1                                                   | 2.607       |
| AMBP                                                       | alpha-1-microglobulin/bikunin precursor                           | 2.536       |
| BSN                                                        | bassoon presynaptic cytomatrix protein                            | 2.535       |
| KLC2                                                       | kinesin light chain 2                                             | 2.283       |
| STK10                                                      | serine/threonine kinase 10                                        | 2.271       |
| MUC1L                                                      | mucin like 1                                                      | 2.224       |
| BTD                                                        | biotinidase                                                       | 2.142       |
| LRG1                                                       | leucine rich alpha-2-glycoprotein 1                               | 2.068       |
| <b>Downregulated in LAN<sup>neg</sup> vs healthy lymph</b> |                                                                   |             |
| PTGDS                                                      | prostaglandin D2 synthase                                         | -1.096      |
| LAMA1                                                      | laminin subunit alpha 1                                           | -71.616     |
| ITPKB                                                      | inositol-trisphosphate 3-kinase B                                 | -29.009     |
| GSN                                                        | gelsolin                                                          | -2.0        |
| ATP5L                                                      | ATP synthase, H+ transporting, mitochondrial Fo complex subunit G | -15.846     |
| CDC5L                                                      | cell division cycle 5 like                                        | -13.439     |
| SACS                                                       | sacsin molecular chaperone                                        | -12.347     |
| FRMD1                                                      | FERM domain containing 1                                          | -9.336      |
| ATXN2                                                      | ataxin 2                                                          | -8.204      |
| RELB                                                       | RELB proto-oncogene, NF-kB subunit                                | -6.517      |
| SCAR3                                                      | scavenger receptor class A member 3                               | -6.274      |
| FN1                                                        | fibronectin 1                                                     | -6.042      |
| EGFL7                                                      | EGF like domain multiple 7                                        | -4.66       |
| PCDH7                                                      | protocadherin 7                                                   | -4.507      |
| FLG                                                        | flaggrin                                                          | -4.324      |
| OBSCN                                                      | obscurin, cytoskeletal calmodulin and titin-interacting RhoGEF    | -3.849      |
| AHNAK                                                      | AHNAK nucleoprotein                                               | -2.72       |
| GRN                                                        | granulin                                                          | -2.455      |

### B LAN<sup>pos</sup> vs healthy lymph

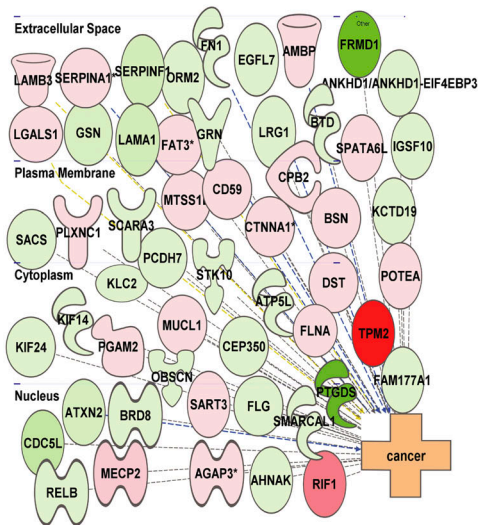

| Symbol                                                     | Entrez Gene Name                                                  | Fold Change |
|------------------------------------------------------------|-------------------------------------------------------------------|-------------|
| <b>Upregulated in LAN<sup>pos</sup> vs healthy lymph</b>   |                                                                   |             |
| TPM2                                                       | tropomyosin 2 (beta)                                              | 173.422     |
| RIF1                                                       | replication timing regulatory factor 1                            | 89.423      |
| MECP2                                                      | methyl-CpG binding protein 2                                      | 37.205      |
| POTEA                                                      | POTE ankyrin domain family member A                               | 17.757      |
| FAT3                                                       | FAT atypical cadherin 3                                           | 15.37       |
| SART3                                                      | squamous cell carcinoma antigen recognized by T-cells 3           | 15.262      |
| PLXNC1                                                     | plexin C1                                                         | 10.34       |
| AGAP3                                                      | ArfGAP with GTPase domain, ankyrin repeat and PH domain 3         | 8.759       |
| PGAM2                                                      | phosphoglycerate mutase 2                                         | 6.818       |
| SPATA6L                                                    | spermatogenesis associated 6 like                                 | 4.406       |
| LGALS1                                                     | galectin 1                                                        | 3.953       |
| DST                                                        | dystonin                                                          | 3.713       |
| MTSS1L                                                     | metastasis suppressor 1 like                                      | 3.403       |
| LAMB3                                                      | laminin subunit beta 3                                            | 3.292       |
| BSN                                                        | bassoon presynaptic cytomatrix protein                            | 2.528       |
| CPB2                                                       | carboxypeptidase B2                                               | 2.433       |
| FLNA                                                       | filamin A                                                         | 2.141       |
| CD59                                                       | CD59 molecule                                                     | 2           |
| <b>Downregulated in LAN<sup>pos</sup> vs healthy lymph</b> |                                                                   |             |
| PTGDS                                                      | prostaglandin D2 synthase                                         | -304.138    |
| FRMD1                                                      | FERM domain containing 1                                          | -245.631    |
| CDC5L                                                      | cell division cycle 5 like                                        | -84.577     |
| LAMA1                                                      | laminin subunit alpha 1                                           | -84.062     |
| SERPINF1                                                   | serpin family F member 1                                          | -60.656     |
| ATXN2                                                      | ataxin 2                                                          | -57.938     |
| GSN                                                        | gelsolin                                                          | -55         |
| ATP5L                                                      | ATP synthase, H+ transporting, mitochondrial Fo complex subunit G | -41.754     |
| FN1                                                        | fibronectin 1                                                     | -27.333     |
| AHNAK                                                      | AHNAK nucleoprotein                                               | -23.852     |
| PCDH7                                                      | protocadherin 7                                                   | -22.202     |
| SCAR3                                                      | scavenger receptor class A member 3                               | -18.792     |
| EGFL7                                                      | EGF like domain multiple 7                                        | -16.904     |
| SACS                                                       | sacsin molecular chaperone                                        | -15.647     |
| GRN                                                        | granulin                                                          | -9.272      |
| OBSCN                                                      | obscurin, cytoskeletal calmodulin and titin-interacting RhoGEF    | -9.04       |
| RELB                                                       | RELB proto-oncogene, NF-kB subunit                                | -7.401      |
| FLG                                                        | flaggrin                                                          | -7.161      |
| BRD8                                                       | bromodomain containing 8                                          | -6.456      |
| ORM2                                                       | orosomucoid 2                                                     | -4.907      |
| CEP350                                                     | centrosomal protein 350                                           | -4.677      |
| SMARCAL1                                                   | subfamily A like 1                                                | -3.771      |
| STK10                                                      | serine/threonine kinase 10                                        | -2.984      |
| KIF14                                                      | kinesin family member 14                                          | -2.971      |
| IGSF10                                                     | immunoglobulin superfamily member 10                              | -2.175      |
| BTD                                                        | biotinidase                                                       | -2.173      |

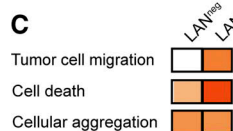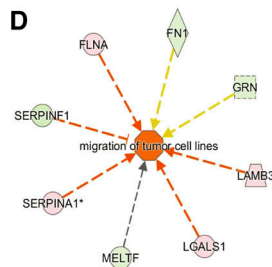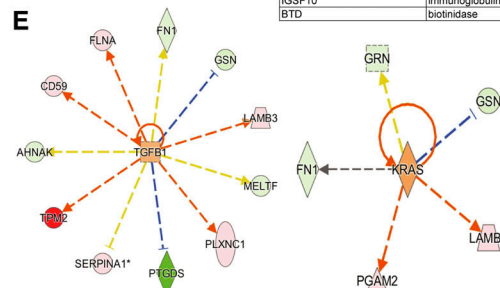

Figure S3. **Melanoma-associated proteins define LAN<sup>neg</sup> and LAN<sup>pos</sup> patients.** (A and B) IPA predicted of cellular and molecular networks and listed melanoma associated proteins that are mostly up- or down-regulated in lymphatic exudate of LAN<sup>neg</sup> (A) or LAN<sup>pos</sup> versus HCs (B). (C) IPA predicted activation z-score comparison of cellular functions associated with melanoma in the proteome of lymphatic exudate from LAN<sup>neg</sup> versus LAN<sup>pos</sup> patients. (D and E) Main z-score proteins predicting tumor cell migration (D) and main predicted upstream master gene regulators (E) for the top expressed proteins in the lymphatic exudate of LAN<sup>pos</sup> patients (orange line: leads to activation; blue line: leads to inhibition; yellow line: finding inconsistent; gray line: effect not predicted; red proteins: up-regulated; green proteins: down-regulated; different shades indicate the extent of the up- or down-regulation; n = 6 LAN<sup>neg</sup>, n = 12 LAN<sup>pos</sup>, HC n = 5 for both lymphatic exudate and plasma). Raw data in Table S1.

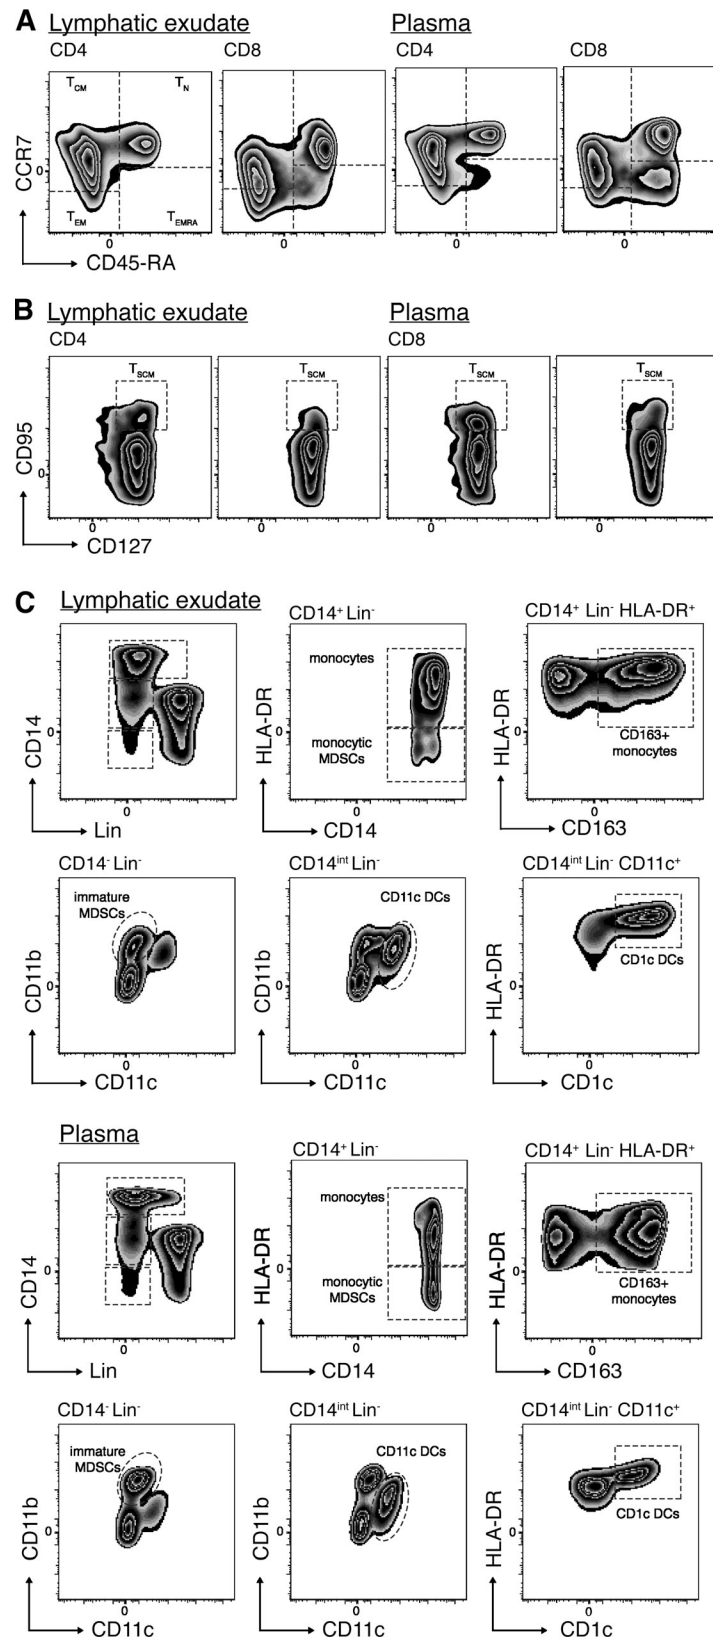

Figure S4. **Gating strategy for flow cytometric analysis of immune cells in lymphatic exudate and plasma. (A)** CD4<sup>+</sup> and CD8<sup>+</sup> T cell subsets T<sub>CM</sub>, T<sub>N</sub>, T<sub>EM</sub>, and T<sub>EMRA</sub> after gating for CD3<sup>+</sup> cells. **(B)** From the naive subsets shown in A, T<sub>SCM</sub> were defined as CD95<sup>hi</sup> and CD127<sup>hi</sup>. **(C)** Monocyte subsets after live/dead and doublets exclusion. Lin, lineage.

Table S1 is provided online as a separate Excel file, and lists clinical data of analyzed patients and the raw proteomic, miRNA, and IPA data.
